# Supplementary material for: Specialized Police-Based Mental Health Crisis Response: The First 10 Years of Colorado’s Crisis Intervention Team Implementation
Source: Atypon-hosted journal article supplement (doi:10.1176/appi.ps.201700055), 2017-11-01
Supplement: appi.ps.201700055.ds001.pdf [file appi.ps.201700055.ds001.pdf]

**Supplemental Table S1 Disposition of 6,353 emergency police calls<sup>a</sup>**

| Characteristic                         | Disposition      |      |                |      |                       |      |                 |      | $\chi^2$ | p     |
|----------------------------------------|------------------|------|----------------|------|-----------------------|------|-----------------|------|----------|-------|
|                                        | None<br>(N=2879) |      | Home<br>(N=39) |      | Treatment<br>(N=3225) |      | Jail<br>(N=210) |      |          |       |
|                                        | N                | %    | N              | %    | N                     | %    | N               | %    |          |       |
| <i>Gender (N=6326)</i>                 |                  |      |                |      |                       |      |                 |      | 40.9     | <.001 |
| Male                                   | 1470             | 51.3 | 23             | 59   | 1685                  | 52.4 | 153             | 73.6 |          |       |
| Female                                 | 1393             | 48.7 | 16             | 41   | 1531                  | 47.6 | 55              | 26.4 |          |       |
| <i>Age (years) (N=6189)</i>            |                  |      |                |      |                       |      |                 |      | 4.40     | .22   |
| 0–17                                   | 682              | 24.4 | 9              | 23.1 | 637                   | 20.3 | 29              | 14.2 |          |       |
| 18–35                                  | 901              | 32.2 | 14             | 35.9 | 1087                  | 34.6 | 96              | 46.8 |          |       |
| 36–60                                  | 1055             | 37.7 | 11             | 28.2 | 1272                  | 40.5 | 76              | 37.1 |          |       |
| 60+                                    | 163              | 5.82 | 5              | 12.8 | 148                   | 4.71 | 4               | 1.95 |          |       |
| Suicidal ideation or act               | 1277             | 44.4 | 11             | 28.2 | 2262                  | 70.1 | 73              | 34.8 | 476.7    | <.001 |
| Suicide threat                         | 884              | 30.7 | 9              | 23.1 | 1583                  | 49.1 | 60              | 28.6 | 232.8    | <.001 |
| Suicide attempt                        | 322              | 11.2 | 1              | 2.56 | 749                   | 23.2 | 20              | 9.52 | 175.9    | <.001 |
| Suicide                                | 0                | 0    | 0              | 0    | 2                     | .06  | 0               | 0    | 2.71     | .44   |
| <i>Psychiatric illness<sup>b</sup></i> | 2062             | 71.6 | 32             | 82.1 | 2391                  | 74.1 | 151             | 71.9 | 6.78     | .08   |
| Substance use Y/N <sup>c</sup>         | 794              | 27.6 | 6              | 15.4 | 1350                  | 41.9 | 76              | 36.2 | 145.1    | <.001 |
| Treatment status (N=5365)              | 1055             | 42.3 | 14             | 43.8 | 1076                  | 40.2 | 65              | 40.9 | 2.49     | .48   |
| Violence threat to others              | 455              | 15.8 | 5              | 12.8 | 493                   | 15.3 | 74              | 35.2 | 47.6     | <.001 |
| Threaten police                        | 102              | 3.54 | 0              | 0    | 131                   | 4.06 | 31              | 14.8 | 42.8     | <.001 |
| <i>Weapon present</i>                  | 860              | 30.9 | 9              | 23.1 | 1749                  | 54.6 | 72              | 36.2 | 386.6    | <.001 |
| <i>Injuries Y/N</i>                    | 249              | 8.65 | 0              | 0    | 535                   | 16.6 | 40              | 19.1 | 104.9    | <.001 |
| To participant                         | 32               | 1.11 | 0              | 0    | 41                    | 1.27 | 10              | 4.76 | 13.6     | .004  |
| To others                              | 7                | .24  | 0              | 0    | 7                     | .22  | 6               | 2.86 | 17.8     | <.001 |
| To police                              | 9                | .31  | 0              | 0    | 7                     | .22  | 3               | 1.43 | 5.72     | .13   |
| <i>Use of force</i>                    | 75               | 2.61 | 3              | 7.69 | 210                   | 6.51 | 29              | 13.8 | 80.3     | <.001 |

<sup>a</sup> Proportions were compared by bivariable multinomial logistic regression analysis with reported likelihood-ratio (LR) chi-square ( $\chi^2$ ) and p-value.

<sup>b</sup> Presence of psychiatric illness determined by family and participant report. <sup>c</sup> Alcohol or drug use determined by officer judgment at scene.

**Supplemental Table S2 Number of Mental Health Crisis Calls, by Colorado Crisis Intervention Team (CIT) Agencies (2005 to 2011)**

| <b>Agency Name</b>       | <b>N</b> | <b>%</b> |
|--------------------------|----------|----------|
| Denver                   | 900      | 14.2     |
| Douglas County Sheriff   | 860      | 13.5     |
| Arvada                   | 609      | 9.58     |
| Arapahoe County Sheriff  | 581      | 9.14     |
| Jefferson County Sheriff | 450      | 7.08     |
| Westminster              | 410      | 6.45     |
| Littleton                | 331      | 5.21     |
| Castle Rock              | 278      | 4.37     |
| Lakewood                 | 270      | 4.25     |
| Thornton                 | 203      | 3.19     |
| Wheat Ridge              | 187      | 2.94     |
| Adams County Sheriff     | 187      | 2.94     |
| Commerce City            | 111      | 1.75     |
| Aurora                   | 101      | 1.59     |
| Greenwood Village        | 100      | 1.57     |
| Golden                   | 96       | 1.51     |
| Larimer County Sheriff   | 87       | 1.37     |
| Lone Tree                | 70       | 1.10     |
| Sheridan                 | 67       | 1.05     |
| Broomfield               | 62       | .98      |
| Pueblo County Sheriff    | 53       | .83      |
| Loveland                 | 44       | .69      |

The following agencies have data on fewer than 50 incidents: Englewood (48), Ft. Collins (32), Ft. Lupton (36), Parker (31), Northglenn (22), Weld County Sheriff (20), Glendale (18), Boulder County Sheriff (15), Brighton (14), Cherry Hills (10), Johnstown (9), Greeley (6), Lochbuie (5), CU-Boulder (4), Longmont (4), Erie (3), Vail (3), Ault (2), Boulder (2), Elbert County Sheriff (2), Federal Heights (2), Milliken (2), Berthoud (1), Firestone (1), Lafayette (1), State Patrol (1).

**Supplemental Table S3 Psychiatric diagnosis: men vs. women<sup>a</sup>**

| Diagnosis <sup>b</sup>             | Male<br>(N=3333) |      | Female<br>(N=2995) |      | Risk Ratio<br>(M/F) | X <sup>2</sup> | p      |
|------------------------------------|------------------|------|--------------------|------|---------------------|----------------|--------|
|                                    | N                | %    | N                  | %    |                     |                |        |
| Any psychiatric                    | 2,098            | 53.1 | 1,851              | 46.9 | 1.13                | 0.88           | .349   |
| No psychiatric                     | 1,235            | 51.9 | 1,144              | 48.1 | 1.08                |                |        |
| Alcohol or drug abuse <sup>c</sup> | 1,230            | 55.5 | 985                | 44.5 | 1.25                | 11.2           | .001   |
| Major depression                   | 695              | 46.0 | 815                | 53.9 | .85                 | 35.1           | <.001* |
| Bipolar disorder                   | 716              | 50   | 716                | 50   | 1                   | 5.29           | .02*   |
| Psychotic disorders                | 371              | 63.3 | 215                | 36.7 | 1.73                | 29.3           | <.001* |
| ADHD                               | 152              | 66.7 | 76                 | 33.3 | 2                   | 18.6           | <.001* |
| Anxiety disorders                  | 92               | 44.9 | 113                | 55.1 | .81                 | 5.16           | .02*   |
| PTSD                               | 107              | 52.7 | 96                 | 47.3 | 1.11                | .0001          | .99    |
| Dementia                           | 34               | 53.1 | 30                 | 46.9 | 1.13                | .005           | .94    |
| Cognitive disability               | 30               | 63.8 | 17                 | 36.2 | 1.76                | 2.36           | .12    |
| OCD                                | 26               | 65   | 14                 | 35   | 1.85                | 2.45           | .12    |
| Autism spectrum                    | 24               | 88.9 | 3                  | 11.1 | 8                   | 14.3           | <.001* |
| Personality disorder               | 6                | 25   | 18                 | 75   | .33                 | 7.39           | .007   |
| Brain injury                       | 4                | 57.1 | 3                  | 42.8 | 1.33                | .06            | .81    |

<sup>a</sup> Proportions were compared by chi square tests. [\*] Significant by Bonferroni-adjustment to  $p \leq 0.004 (0.05/12)$ .

<sup>b</sup> Data are ranked by overall prevalence. Diagnostic impressions based on self- or family reports.

<sup>c</sup> Officer judgment of presence of alcohol or drugs.

**Supplemental Table S4 Violence threat, injuries, use of force, arrest, S.W.A.T. callout and disposition in 6328 incidents, men vs. women<sup>a</sup>**

| Characteristic                         | Male<br>(N=3333) |      | Female<br>(N=2995) |      | Risk Ratio<br>(M/F) | X <sup>2</sup> | p     |
|----------------------------------------|------------------|------|--------------------|------|---------------------|----------------|-------|
|                                        | N                | %    | N                  | %    |                     |                |       |
| <i>Age</i>                             |                  |      |                    |      |                     | 43.1           | <.001 |
| 0–17                                   | 713              | 21.9 | 636                | 21.8 | 1.12                | .03            |       |
| 18–35                                  | 1212             | 37.3 | 882                | 30.2 | 3.74                | 34.9           |       |
| 36–60                                  | 1179             | 36.3 | 1231               | 42.1 | .96                 | 21.9           |       |
| 60+                                    | 145              | 4.46 | 174                | 5.95 | .83                 | 6.97           |       |
| Suicide threat                         | 1354             | 40.6 | 1178               | 39.3 | 1.15                | 1.10           | .29   |
| Suicide attempt                        | 499              | 15.0 | 591                | 19.7 | .84                 | 25.1           | <.001 |
| Threaten others                        | 724              | 21.7 | 297                | 9.92 | 2.44                | 162.5          | <.001 |
| Threaten police                        | 204              | 6.12 | 58                 | 1.94 | 3.52                | 65.6           | <.001 |
| S.W.A.T. called out                    | 39               | 1.17 | 14                 | .47  | 2.79                | 9.38           | .002  |
| Use of Force                           | 192              | 5.76 | 124                | 4.14 | 1.55                | 8.73           | .003  |
| Arrest                                 | 209              | 6.27 | 99                 | 3.31 | 2.11                | 29.9           | <.001 |
| <i>Disposition</i>                     |                  |      |                    |      |                     | 39.1           | <.001 |
| Home                                   | 23               | .69  | 16                 | .53  | 1.44                | .63            |       |
| Legal (Jail)                           | 157              | 4.71 | 57                 | 1.90 | 2.75                | 38.1           |       |
| Medical/Psychiatric                    | 1681             | 50.4 | 1529               | 51.1 | 1.10                | 0.24           |       |
| None/Resolved at Scene                 | 1470             | 44.1 | 1393               | 46.5 | 1.06                | 3.69           |       |
| <i>Injuries<sup>b</sup></i>            |                  |      |                    |      |                     |                |       |
| Injured prior to police contact        | 441              | 13.2 | 384                | 12.8 | 1.15                | .23            | .63   |
| Injured after or during police contact | 429              | 12.9 | 369                | 12.3 | 1.16                | .43            | .51   |
| Injured after or during police contact | 43               | 1.29 | 18                 | .60  | 2.39                | 7.85           | .005  |

<sup>a</sup> Proportions were compared by chi square tests.

<sup>b</sup> Injuries occurred in both time frames in 34 participants.

Figure Special Weapons and Tactics (S.W.A.T.) callout, use of force, injuries and arrests by sex and age

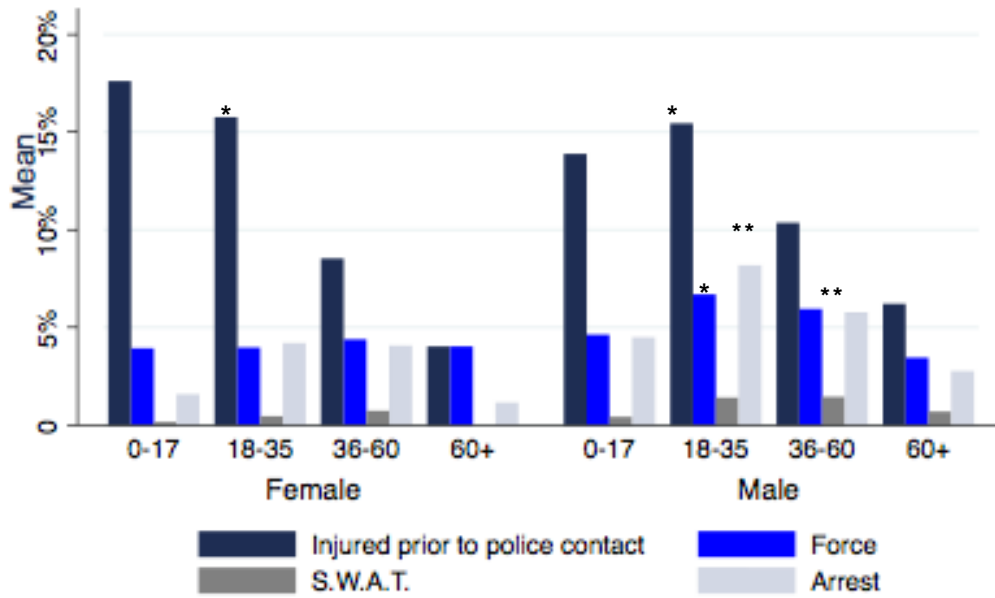

\*Significant age differences by  $\chi^2$ ,  $p < .05$ .

\*\*Significant age+sex differences by  $\chi^2$ ,  $p < .05$ .
